# Supplementary material for: Remodeling of the Residual Gastric Mucosa after Roux-En-Y Gastric Bypass or Vertical Sleeve Gastrectomy in Diet-Induced Obese Rats
Source: PubMed Central journal article supplement (PMC4379088; doi:10.1371/journal.pone.0121414), 2015-03-30
Supplement: pone.0121414.s006.pdf [file pone.0121414.s006.pdf]

| <b>Gene</b> | <b>Accession</b> | <b>Primers (5'-&gt;3')</b>                                    |
|-------------|------------------|---------------------------------------------------------------|
| L19         | NM_031103.1      | Forward TGCCGGAAGAACACCTTG<br>Reverse GCAGGATCCTCATCCTTCG     |
| Ghrelin     | NM_021669.2      | Forward CCCAGAGGACAGAGGACAAG<br>Reverse AACATCGAAGGGAGCATTGA  |
| Gastrin     | NM_012849.1      | Forward CCGCAACACTTCATAGCAGA<br>Reverse CATCCATCCGTATGCTTCCT  |
| FAS         | NM_017332.1      | Forward GGCCACCTCAGTCCTGTTAT<br>Reverse AGGGTCCAGCTAGAGGGTACA |
| ACCalpha    | NM_022193.1      | Forward ACAGAGATGGTGGCTGATGTC<br>Reverse GATCCCCATGGCAATCTG   |
